# Supplementary material for: Patient-Derived Papillary Thyroid Cancer Organoids for Radioactive Iodine Refractory Screening
Source: PubMed Central journal article supplement (PMC7692469; doi:10.3390/cancers12113212), 2020-10-31
Supplement: cancers-12-03212-s001.pdf [file cancers-12-03212-s001.pdf]

# Supplementary Materials: Patient-Derived Papillary Thyroid Cancer Organoids for Radioactive Iodine Refractory Screening

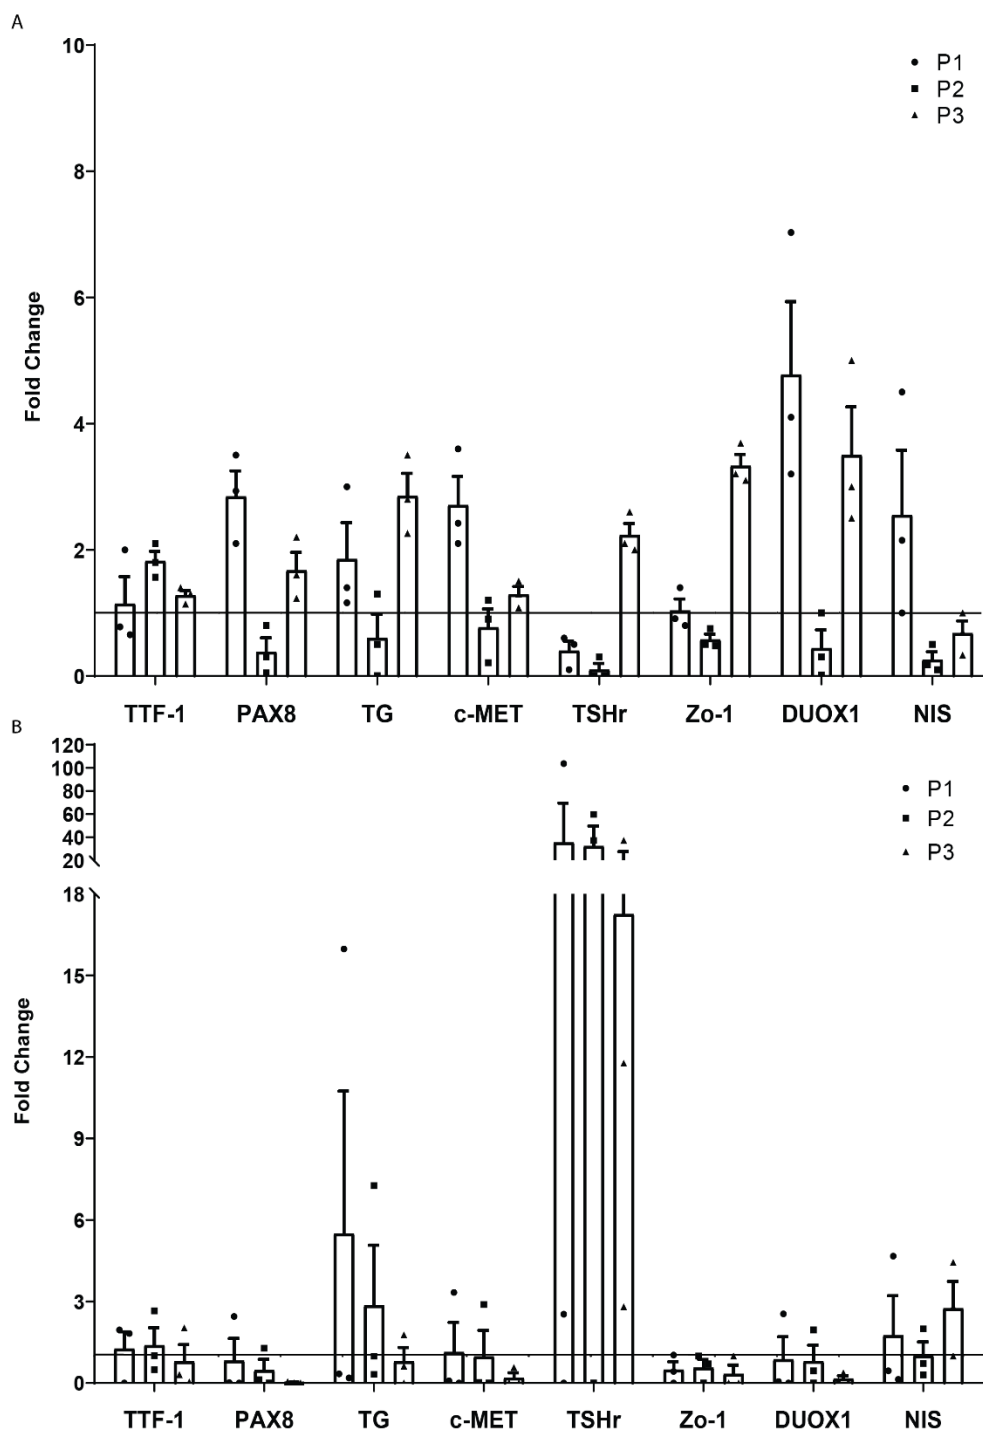

**Figure S1.** Changes in gene expression between passages in PTC and RAIRD organoids.

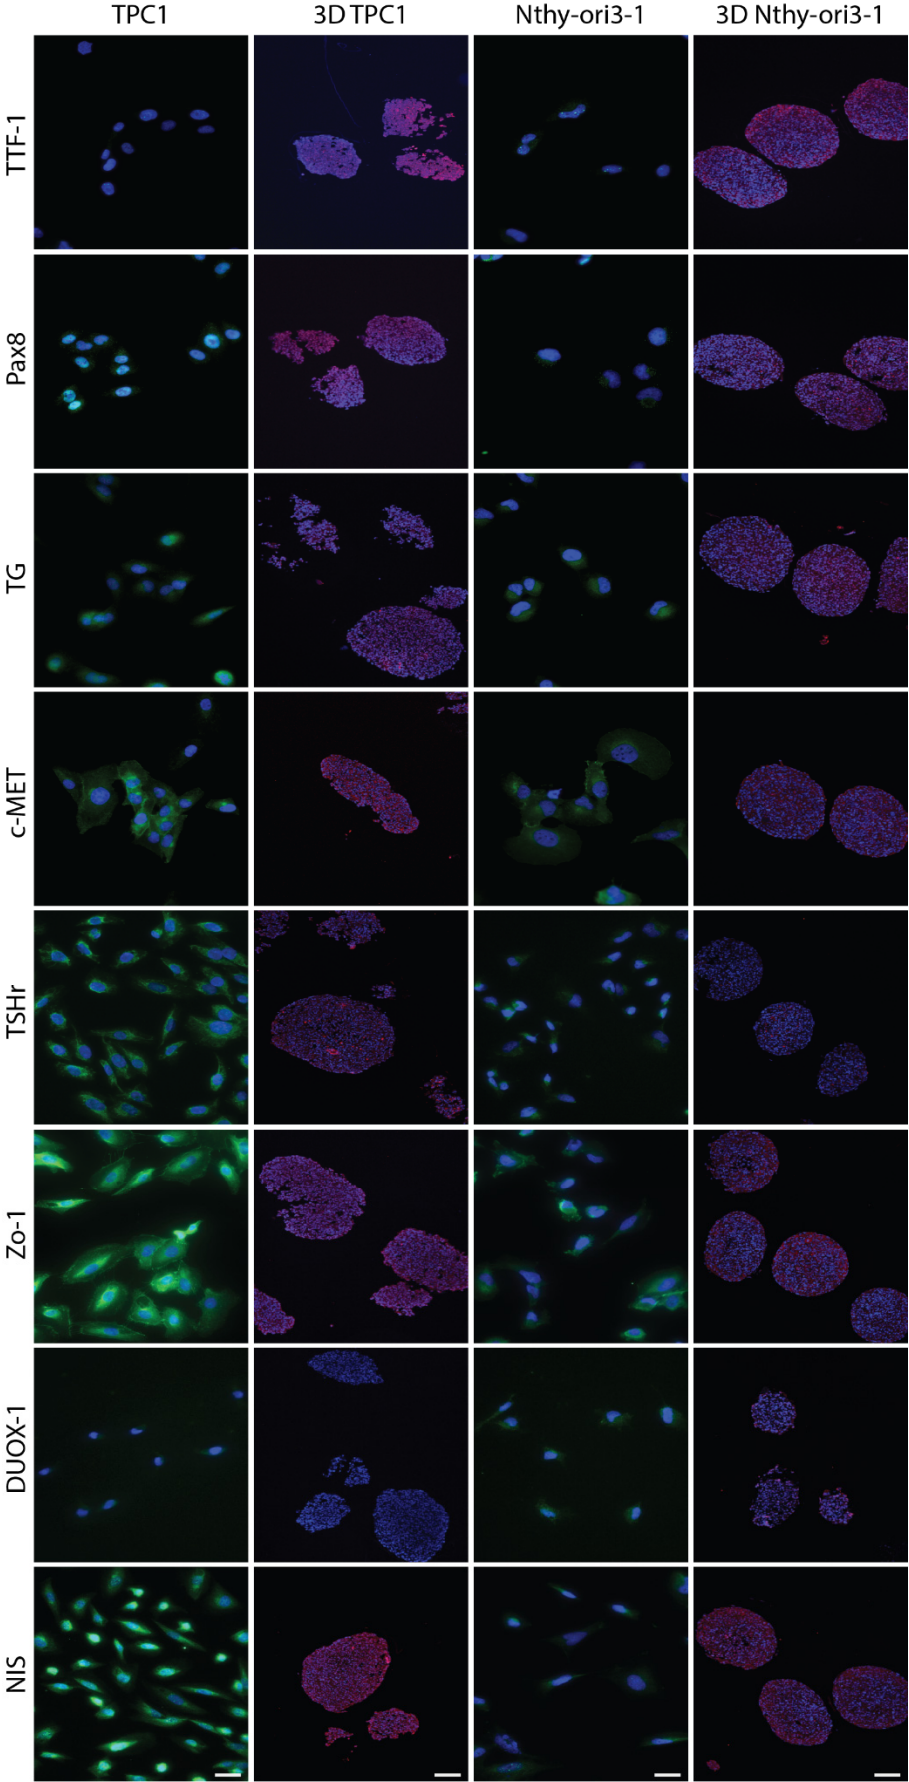

Figure S2. Immunofluorescent analysis of proteins of interest in 2D- and 3D-grown Nthy-ori3-1 and TPC1 cell lines.

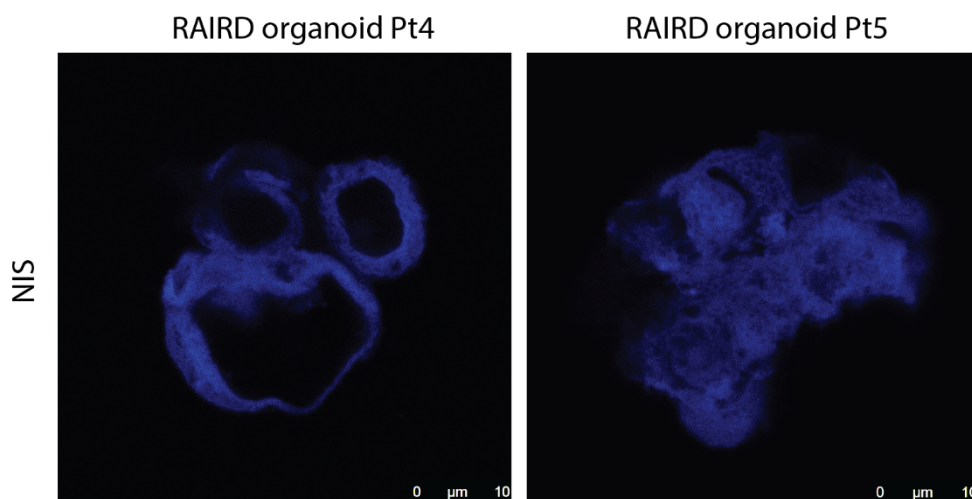

**Figure S3.** Immunofluorescent analysis of NIS expression in RAIRD organoids from patients four and five.

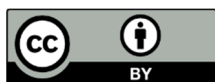

© 2020 by the authors. Licensee MDPI, Basel, Switzerland. This article is an open access article distributed under the terms and conditions of the Creative Commons Attribution (CC BY) license (<http://creativecommons.org/licenses/by/4.0/>).
